# Supplementary material for: Leveraging Spatial Variation in Tumor Purity for Improved Somatic Variant Calling of Archival Tumor Only Samples
Source: PubMed Central journal article supplement (PMC6435595; doi:10.3389/fonc.2019.00119), 2019-03-20

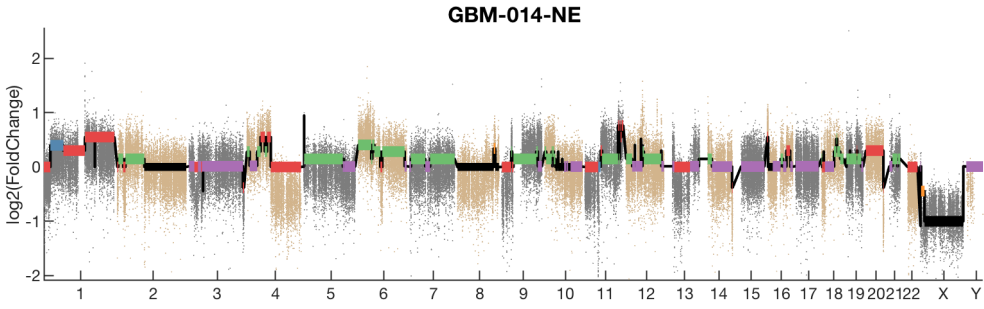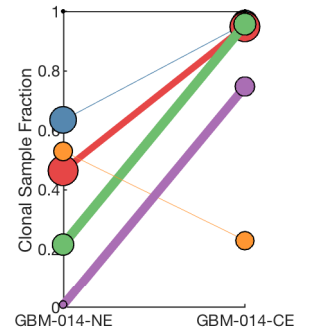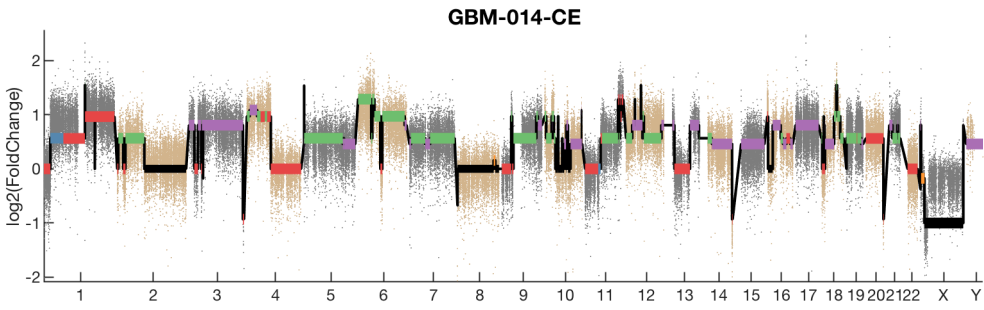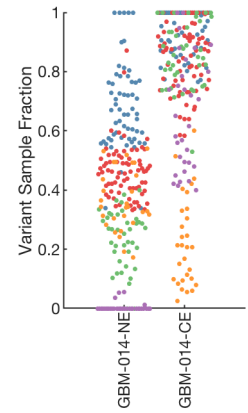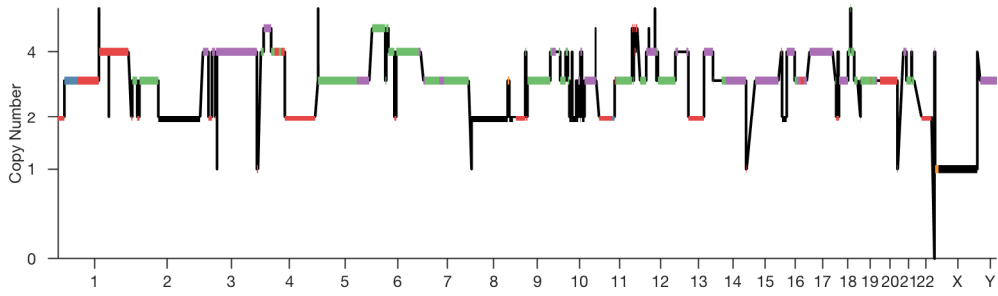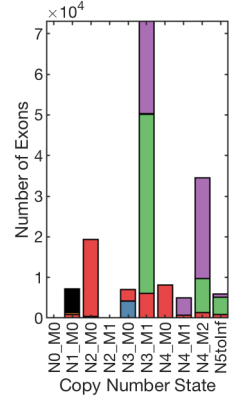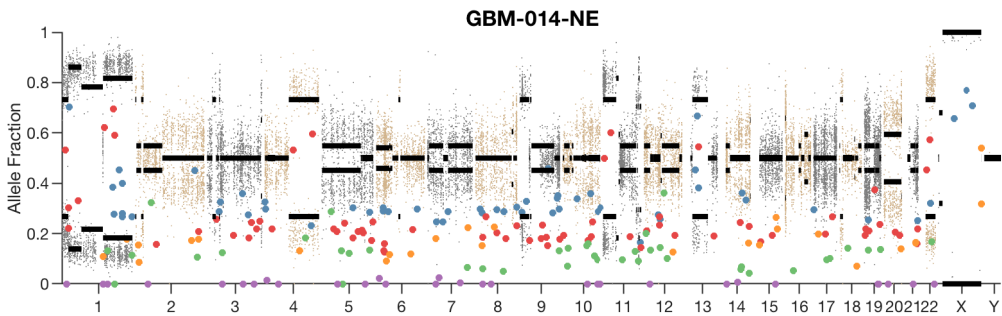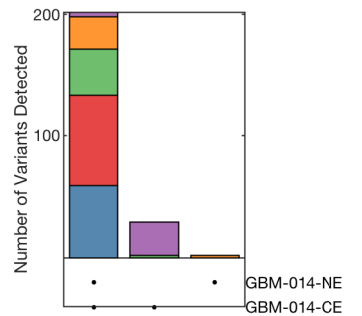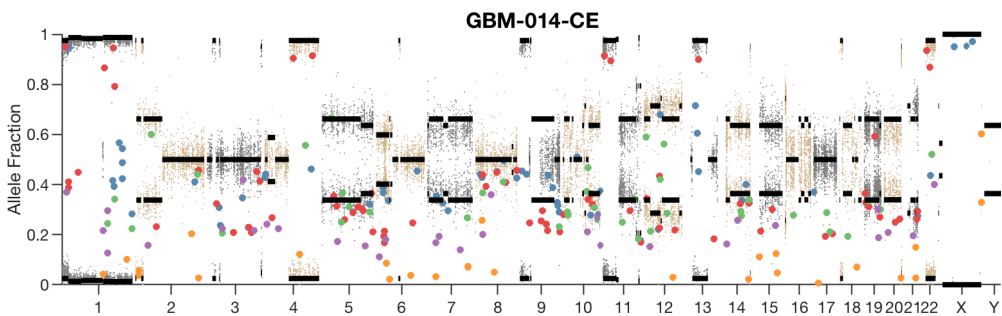

Supplement: Image_1.pdf [file Image_1.pdf]
